# Supplementary material for: Electrochemical characterization of and theoretical insight into a series of 2D MOFs, [M(bipy)(C4O4)(H2O)2]·3H2O (M = Mn (1), Fe (2), Co (3) and Zn (4)), for chemical sensing applications
Source: Royal Society of Chemistry journal article supplement (doi:10.1039/d1ra04622e), 2021-01-01
Supplement: d1ra04622e1.pdf [file d1ra04622e1.pdf]

# Electrochemical Characterization and Theoretical Insight of A Series of 2D MOFs, [M(bipy)(C<sub>4</sub>O<sub>4</sub>)(H<sub>2</sub>O)<sub>2</sub>]<sub>3</sub>·3H<sub>2</sub>O (M = Mn (1), Fe (2), Co (3) and Zn (4)) for Chemical Sensing Applications

Yi-Ting Hsieh,<sup>\*</sup> Ssu-Chia Huang, Shih-I Lu,<sup>\*</sup> Hsiao-Hsun Wang, Tsai-Wen Chang, and  
Chih-Chieh Wang<sup>\*</sup>, Gene-Hsiang Lee,<sup>b</sup> and Yu-Chun Chuang,<sup>c</sup>

<sup>a</sup>Department of Chemistry, Soochow University. Taipei City, 111, Taiwan.

<sup>b</sup>Instrumentation Center, National Taiwan University, Taipei, 10617, Taiwan.

<sup>c</sup>National Synchrotron Radiation Research Center, Hsinchu, 30076, Taiwan.

## Support Information

**Table S1.** Experimental data of CV measurements of as-prepared electrodes in 0.5 mM NFZ/0.1 M PB solution (pH = 7) with a scan rate of 50 mV s<sup>-1</sup>

**Table S2.** HSE06/DZP//Expt calculated band gap of the MOF of study and the spin polarization of metal ion within the MOF environment and in the free ion state (in italics)

**Table S3.** Comparison of the Mn-MOF modified SPCE with other modified electrodes for the quantitative analysis of NFZ.

**Table S4.** Crystal data and structural refinement for Co-MOF.

**Table S5.** Selected bond lengths (Å) and angle (°) for Co-MOF.

**Table S6.** The O–H...O hydrogen bonds for Co-MOF.

**Table S1.** Experimental data of CV measurements of as-prepared electrodes in 0.5 mM NFZ/0.1 M PB solution (pH = 7) with a scan rate of 50 mV s<sup>-1</sup>

| Electrode   | Peak potential (V) | Maximum peak current density (mA cm <sup>-2</sup> ) |
|-------------|--------------------|-----------------------------------------------------|
| Bare SPCE   | -0.49805           | 0.37                                                |
| Mn-MOF/SPCE | -0.49316           | 0.79                                                |
| Fe-MOF/SPCE | -0.50049           | 0.65                                                |
| Co-MOF/SPCE | -0.47852           | 0.63                                                |
| Zn-MOF/SPCE | -0.55908           | 0.39                                                |

**Table S2.** HSE06/DZP//Expt calculated band gap of the MOF of study and the spin polarization of metal ion within the MOF environment and in the free ion state (in italics)

| Metal ion | Band Gap of MOF (eV) | Spin polarization of metal ion |
|-----------|----------------------|--------------------------------|
| Mn(II)    | 1.834                | 4.627; 5                       |
| Fe(II)    | 1.841                | 3.705; 4                       |
| Co(II)    | 2.167                | 2.720; 3                       |
| Zn(II)    | 2.266                | 0.000; 0                       |

**Table S3.** Comparison of the Mn-MOF modified SPCE with other modified electrodes for the quantitative analysis of NFZ.

| Working electrode                                          | Method            | Potential<br>(V vs Ag/AgCl) | Linear range<br>( $\mu\text{M}$ ) | Detection limit<br>( $\mu\text{M}$ ) | Ref.         |
|------------------------------------------------------------|-------------------|-----------------------------|-----------------------------------|--------------------------------------|--------------|
| Au-AuNR <sup>a</sup>                                       | Chronoamperometry | -0.4                        | 50-610                            | 6.51                                 | [1]          |
| Gr/Fe <sub>3</sub> O <sub>4</sub> /GCE <sup>b</sup>        | Chronoamperometry | -0.395                      | 10-109                            | 2.92                                 | [2]          |
| MWCNTs-COOH/GCE <sup>c</sup>                               | Chronoamperometry | -0.36                       | 5-1090                            | 0.224                                | [3]          |
| S/M*/PME <sup>d</sup>                                      | DPV               | -0.1 to -0.6                | 0.05-2.0                          | 0.012                                | [4]          |
| PACBK/GCE <sup>e</sup>                                     | DPV               | 0 to -0.7                   | 0.2-15.0;<br>15.0-80.0            | 0.028                                | [5]          |
| AuNPs/Gr/TFGE <sup>f</sup>                                 | DPV               | 0 to -0.8                   | 0.2-4800                          | 0.13                                 | [6]          |
| Hollow MIL-101/GCE <sup>g</sup>                            | DPV               | 0.6 to 1.4                  | 0.030-55                          | 0.01                                 | [7]          |
| DUT-67/T-PPY-2/GCE <sup>h</sup>                            | DPV               | -0.1 to -0.7                | 9.08-354.08;<br>354.08-1004.4     | 8.7                                  | [8]          |
| BC/Cr <sub>2</sub> O <sub>3</sub> /Ag/MIP/GCE <sup>i</sup> | DPV               | -0.2 to -0.7                | 0.005-10                          | 0.003                                | [9]          |
| Mn-MOF/SPCE                                                | DPV               | 0 to -0.7                   | 32.65-751.55                      | 21.08                                | this<br>work |

a : gold nanorods electrodeposited-Au electrode

b : graphene and Fe<sub>3</sub>O<sub>4</sub> nanoparticles modified glassy carbon electrode

c: carboxylic multi-walled carbon nanotubes modified glassy carbon electrode

d: screen-printed carbon electrode coated electrochemically activated MWCNT (M\*) and covered PME

e: poly(acid chrome blue K)-modified glassy carbon electrode

f: gold nanoparticles/graphene modified thin film gold electrode

g: MIL-101 modified glassy carbon electrode

h: DUT-67 combines tubular polypyrrole modified glassy carbon electrode

i: a molecularly imprinted polymer coating biomass carbon decorated with MOF-derived Cr<sub>2</sub>O<sub>3</sub> and silver nanoparticles

Spearman correlation coefficient:

The Spearman correlation coefficient is defined as the Pearson correlation coefficient between the rank variables. The Spearman correlation coefficient,  $\rho$ , is calculated by

$$\rho = 1 - \frac{\sum_i d_i^2}{n(n^2 - 1)}$$

in which,  $n$  is the number of data points and  $d_i$  is the difference in ranks of the  $i^{\text{th}}$  data point.



**Table S4.** Crystal data and structural refinement for Co-MOF.

|                                                                                                   |                                                                               |                                                                        |                            |
|---------------------------------------------------------------------------------------------------|-------------------------------------------------------------------------------|------------------------------------------------------------------------|----------------------------|
| Formula                                                                                           | C <sub>14</sub> H <sub>18</sub> Co <sub>1</sub> N <sub>2</sub> O <sub>9</sub> | Fw                                                                     | 417.23                     |
| cryst syst                                                                                        | monoclinic                                                                    | space group                                                            | <i>P</i> 2 <sub>1</sub> /c |
| <i>a</i> (Å)                                                                                      | 18.8828(7)                                                                    | $\alpha$ (deg)                                                         | 90.0                       |
| <i>b</i> (Å)                                                                                      | 11.3176(4)                                                                    | $\beta$ (deg)                                                          | 94.0405(14)                |
| <i>c</i> (Å)                                                                                      | 8.0387(3)                                                                     | $\gamma$ (deg)                                                         | 90.0                       |
| <i>V</i> (Å <sup>3</sup> )                                                                        | 1713.66(11)                                                                   | <i>Z</i>                                                               | 4                          |
| <i>D</i> <sub>calc</sub> (g/cm <sup>3</sup> )                                                     | 1.617                                                                         | $\mu$ (mm <sup>-1</sup> )                                              | 1.054                      |
| <i>F</i> (000)                                                                                    | 860                                                                           | max and min trans                                                      | 0.6515, 0.7459             |
| reflns collected                                                                                  | 4887                                                                          | unique reflns ( <i>I</i> > 2 $\sigma$ ( <i>I</i> ))                    | 4632                       |
| <i>R</i> <sub>1</sub> , <i>wR</i> <sub>2</sub> <sup>a</sup> ( <i>I</i> > 2 $\sigma$ ( <i>I</i> )) | 0.0710, 0.1311                                                                | <i>R</i> <sub>1</sub> , <i>wR</i> <sub>2</sub> <sup>a</sup> (all data) | 0.0753, 0.1329             |
| GOF on <i>F</i> <sup>2</sup>                                                                      | 1.306                                                                         | no. of variable                                                        | 269                        |

$$^a R_1 = \Sigma ||F_o - F_c| / \Sigma |F_o|; wR_2 = [\Sigma w|F_o^2 - F_c^2|^2 / \Sigma w(F_o^4)]^{1/2}.$$

**Table S5.** Selected bond lengths (Å) and angle (°) for Co-MOF <sup>a</sup>

|                                                          |           |                                                            |           |
|----------------------------------------------------------|-----------|------------------------------------------------------------|-----------|
| Co(1)–O(5)                                               | 2.035(3)  | Co(2)–O(6)                                                 | 2.062(3)  |
| Co(1)–O(5) <sub><i>i</i></sub>                           | 2.035(3)  | Co(2)–O(6) <sub><i>ii</i></sub>                            | 2.062(3)  |
| Co(1)–O(1)                                               | 2.102(3)  | Co(2)–O(3)                                                 | 2.126(3)  |
| Co(1)–O(1) <sub><i>i</i></sub>                           | 2.102(3)  | Co(2)–O(3) <sub><i>ii</i></sub>                            | 2.126(3)  |
| Co(1)–N(1)                                               | 2.225(3)  | Co(2)–N(2)                                                 | 2.126(3)  |
| Co(1)–N(1) <sub><i>i</i></sub>                           | 2.225(3)  | Co(2)–N(2) <sub><i>ii</i></sub>                            | 2.126(3)  |
| O(5)–Co(1)–O(5) <sub><i>i</i></sub>                      | 180.0     | O(6) <sub><i>ii</i></sub> –Co(1)–O(6)                      | 180.0     |
| O(5) <sub><i>i</i></sub> –Co(1)–O(1)                     | 85.80(12) | O(6) <sub><i>ii</i></sub> –Co(1)–O(3) <sub><i>ii</i></sub> | 92.28(12) |
| O(5) <sub><i>i</i></sub> –Co(1)–O(1) <sub><i>i</i></sub> | 94.20(12) | O(6)–Co(1)–O(3) <sub><i>ii</i></sub>                       | 87.73(12) |
| O(5)–Co(1)–O(1)                                          | 94.20(12) | O(6) <sub><i>ii</i></sub> –Co(1)–O(3)                      | 87.73(12) |
| O(5) <sub><i>i</i></sub> –Co(1)–O(1)                     | 85.80(12) | O(6)–Co(1)–O(3)                                            | 92.28(12) |
| O(1) <sub><i>i</i></sub> –Co(1)–O(1)                     | 180.00(6) | O(3) <sub><i>ii</i></sub> –Co(1)–O(3)                      | 180.00(6) |
| O(5)–Co(1)–N(1) <sub><i>i</i></sub>                      | 89.51(13) | O(6) <sub><i>ii</i></sub> –Co(1)–N(2) <sub><i>ii</i></sub> | 88.31(13) |
| O(5) <sub><i>i</i></sub> –Co(1)–N(1) <sub><i>i</i></sub> | 90.48(13) | O(6)–Co(1)–N(2) <sub><i>ii</i></sub>                       | 91.69(13) |
| O(1) <sub><i>i</i></sub> –Co(1)–N(1) <sub><i>i</i></sub> | 93.30(12) | O(3) <sub><i>ii</i></sub> –Co(1)–N(2) <sub><i>ii</i></sub> | 86.27(12) |
| O(1)–Co(1)–N(1) <sub><i>i</i></sub>                      | 86.70(12) | O(3)–Co(1)–N(2) <sub><i>ii</i></sub>                       | 93.73(12) |
| O(5)–Co(1)–N(1)                                          | 90.48(13) | O(6) <sub><i>ii</i></sub> –Co(1)–N(2)                      | 91.69(13) |
| O(5) <sub><i>i</i></sub> –Co(1)–N(1)                     | 89.51(13) | O(6)–Co(1)–N(2)                                            | 88.31(13) |
| O(1) <sub><i>i</i></sub> –Co(1)–N(1)                     | 86.70(12) | O(3) <sub><i>ii</i></sub> –Co(1)–N(2)                      | 93.73(12) |
| O(1)–Co(1)–N(1)                                          | 93.30(12) | O(3)–Co(1)–N(2)                                            | 86.27(12) |
| N(1) <sub><i>i</i></sub> –Co(1)–N(1)                     | 180.00(6) | N(2) <sub><i>ii</i></sub> –Co(1)–N(2)                      | 180.00(6) |

<sup>a</sup> Symmetry transformations used to generate equivalent atoms: *i* =  $-x + 2, -y + 3, -z + 1$ ;  
*ii* =  $-x + 1, -y + 2, -z$ .

**Table S6.** The O–H...O hydrogen bonds for Co-MOF.<sup>a</sup>

| D–H...A                              | D–H (Å) | H...A (Å) | D...A (Å) | ∠ D–H...A (°) |
|--------------------------------------|---------|-----------|-----------|---------------|
| O(5)–H(5A)...O(2) <sub>i</sub>       | 0.825   | 1.887     | 2.701     | 168.7         |
| O(5)–H(5B)...O(2) <sub>ii</sub>      | 0.824   | 1.812     | 2.607     | 161.8         |
| O(6)–<br>H(6A)...O(4) <sub>iii</sub> | 0.830   | 1.927     | 2.735     | 164.0         |
| O(6)–H(6B)...O(4) <sub>iv</sub>      | 0.830   | 1.826     | 2.641     | 166.8         |
| O(7)–<br>H(7A)...O(3) <sub>iii</sub> | 0.828   | 2.047     | 2.858     | 166.4         |
| O(7)–H(7B)...O(8) <sub>v</sub>       | 0.826   | 1.950     | 2.752     | 163.6         |
| O(8)–H(8A)...O(9)                    | 0.829   | 1.958     | 2.760     | 162.7         |
| O(8)–H(8B)...O(7)                    | 0.831   | 1.967     | 2.761     | 159.6         |
| O(9)–<br>H(9A)...O(1) <sub>vi</sub>  | 0.828   | 2.036     | 2.837     | 162.3         |
| O(9)–H(9B)...O(8) <sub>v</sub>       | 0.827   | 2.042     | 2.783     | 149.0         |

<sup>a</sup> Symmetry transformations used to generate equivalent atoms:  $i = -x + 2, -y - 1, -z + 1$ ;  $ii = -x + 2, -y + 7/2, -z + 5/2$ ;  $iii = -x + 1, -y - 1, -z$ ;  $iv = -x + 1, -y + 5/2, -z + 3/2$ ;  $v = x, -y + 3/2, z + 1/2$ ;  $vi = x, -y + 5/2, z - 1/2$ .

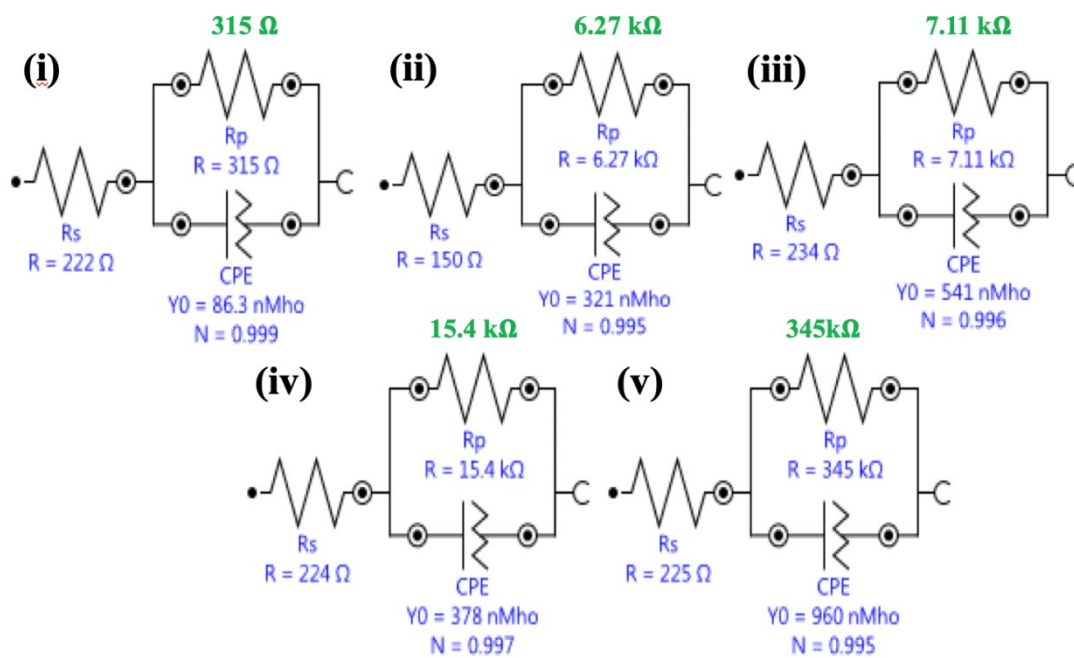

**Figure S1.** Related equivalent circuit of the as-prepared MOF modified electrodes in a solution of 5 mM  $[\text{Fe}(\text{CN})_6]^{3-/4-}$  with 0.1 M KCl. (i) bare SPCE, (ii) Mn-MOF, (iii) Fe-MOF, (iv) Co-MOF, and (v) Zn-MOF.



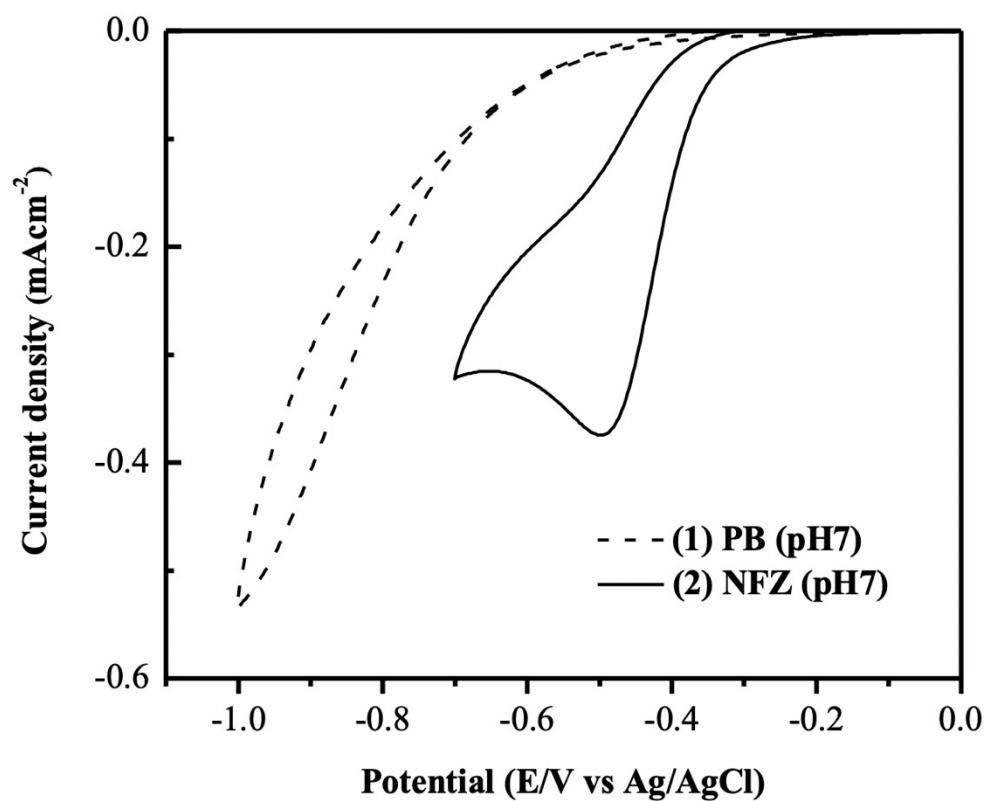

**Figure S2.** CV curves recorded on the SPCE in 0.1M PB solution (pH 7) (a) without and (b) with 0.5 mM NFZ. The scan rate is 50 mV s<sup>-1</sup>.

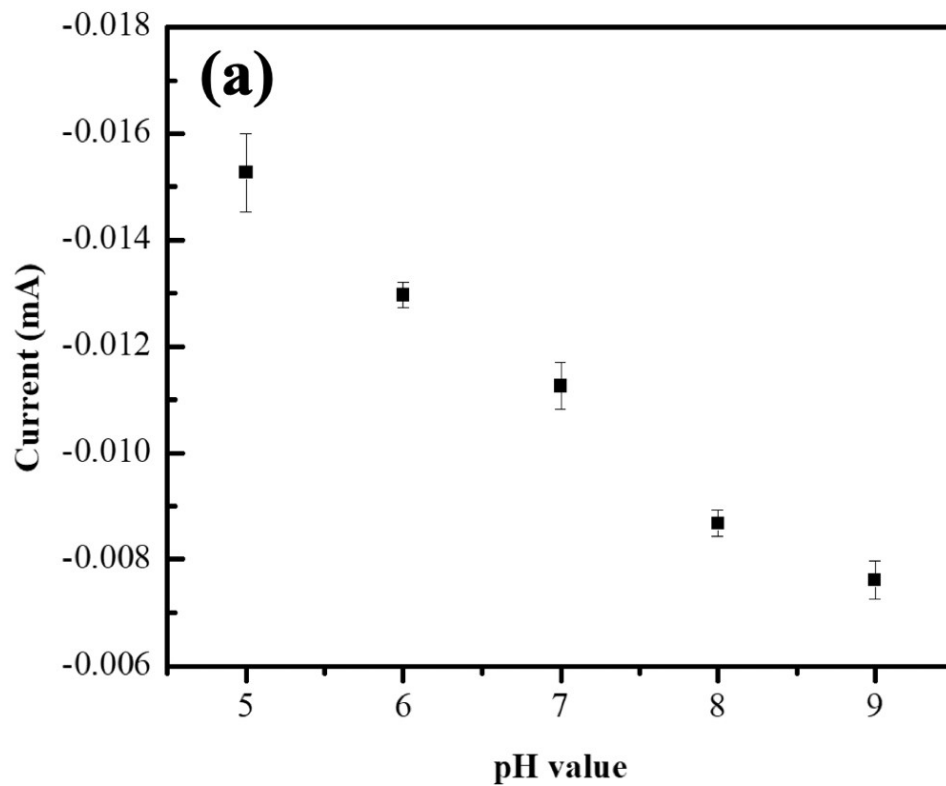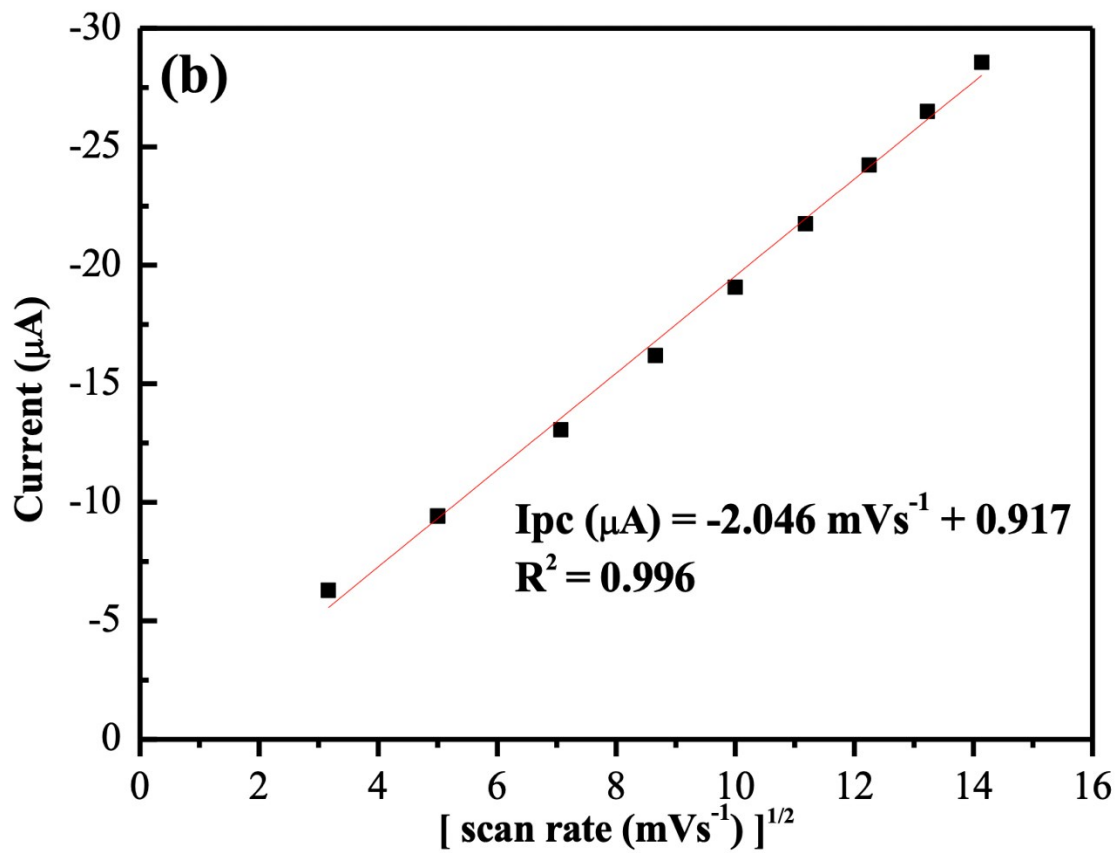

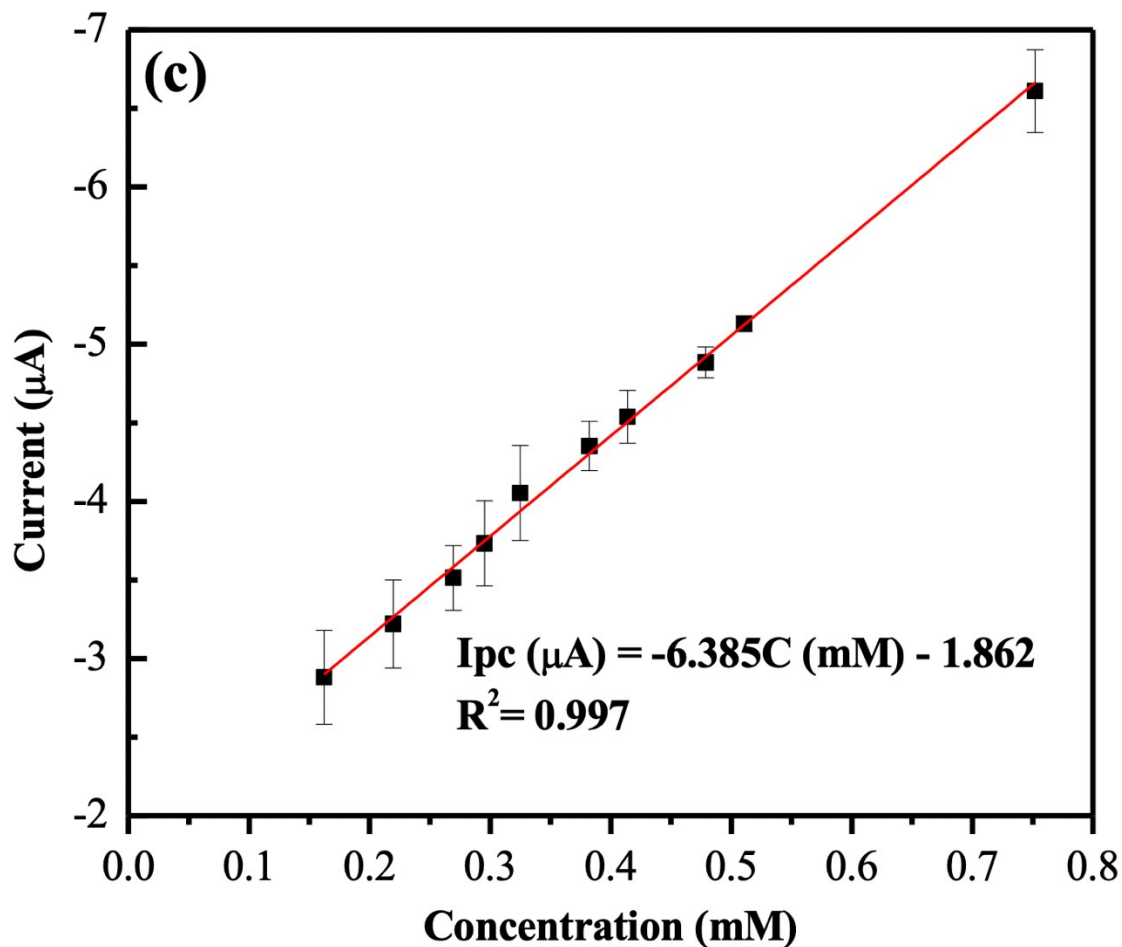

**Figure S3.** (a) Plot of peak current vs. pH value. The current responses were obtained by 5 replicate measurements using 5 modified electrodes. The results were obtained from cyclic voltammograms of 0.5 mM NFZ in 0.1M PB solution on Mn-MOF modified electrode. (b) The plot of the peak current ( $\mu\text{A}$ ) vs the square root of the scan rate ( $10\text{--}200 \text{ mV s}^{-1}$ ), and (c) linear fitting between the current peak ( $\mu\text{A}$ ) and the corresponding concentration (mM) recorded on Mn-MOF modified electrode in 0.5 mM NFZ in PB solution (pH 5). The current responses were obtained by 5 replicate measurements using 5 modified electrodes.

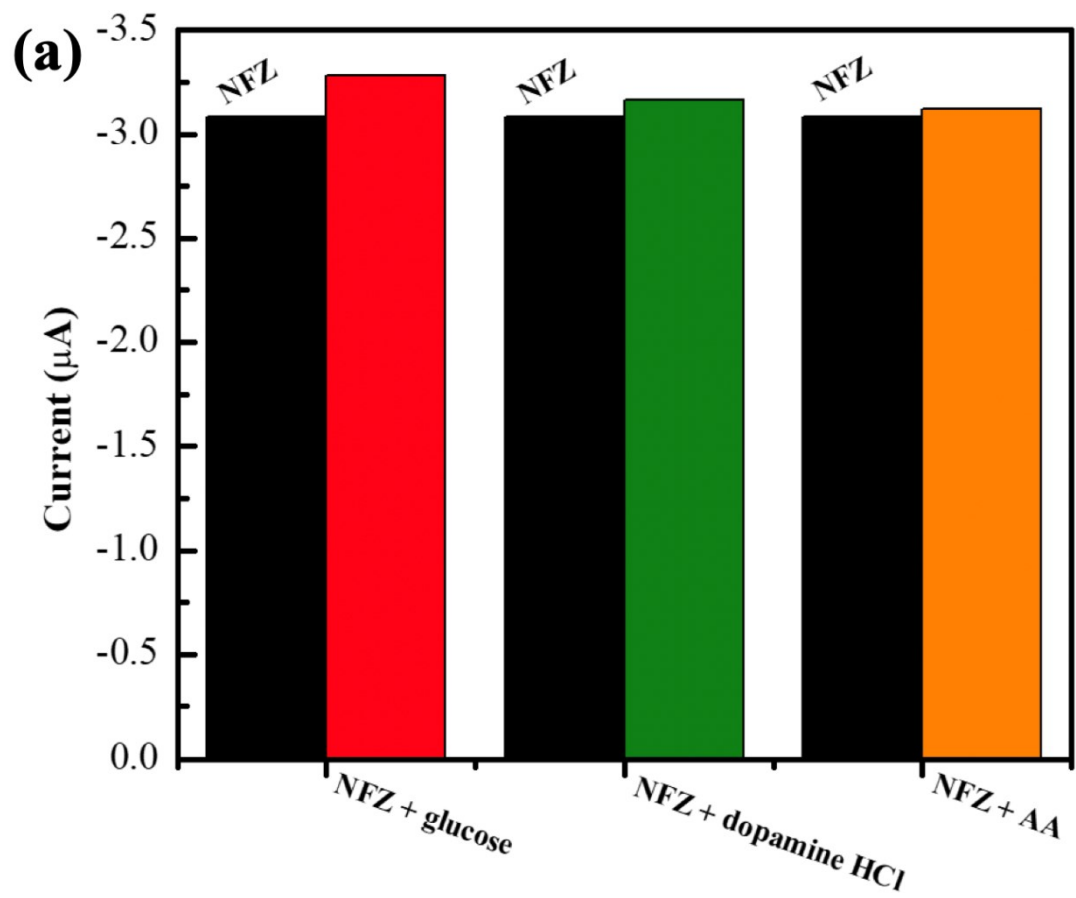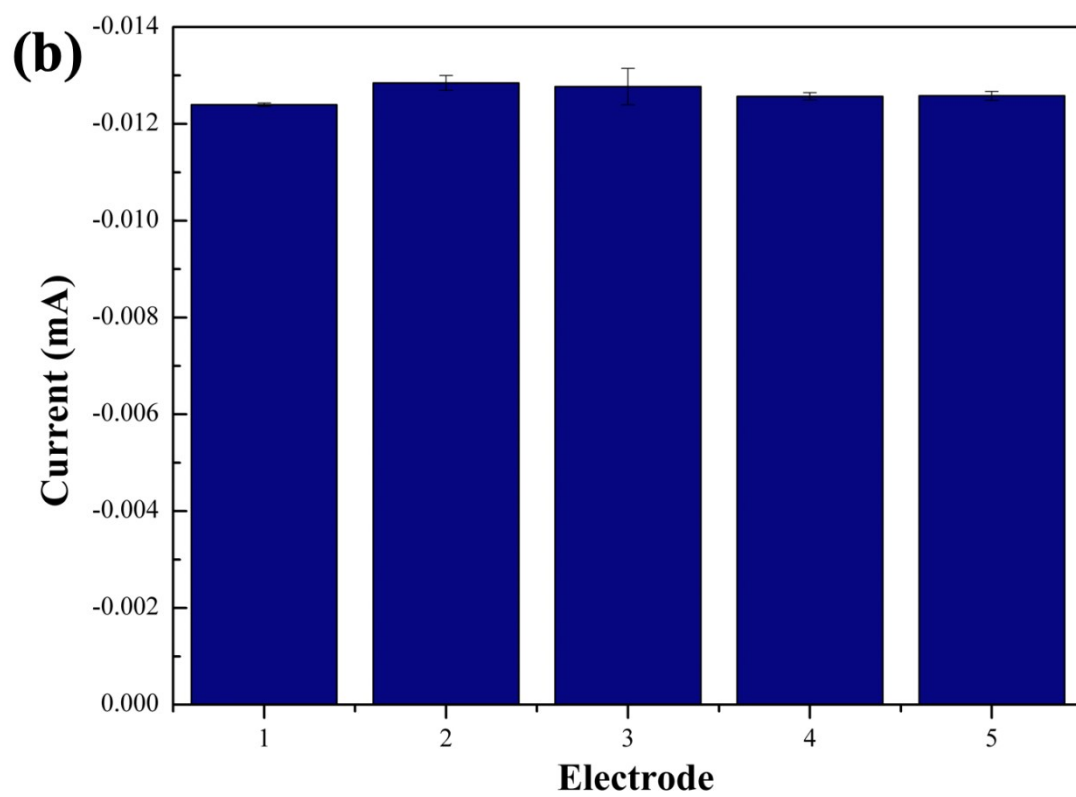

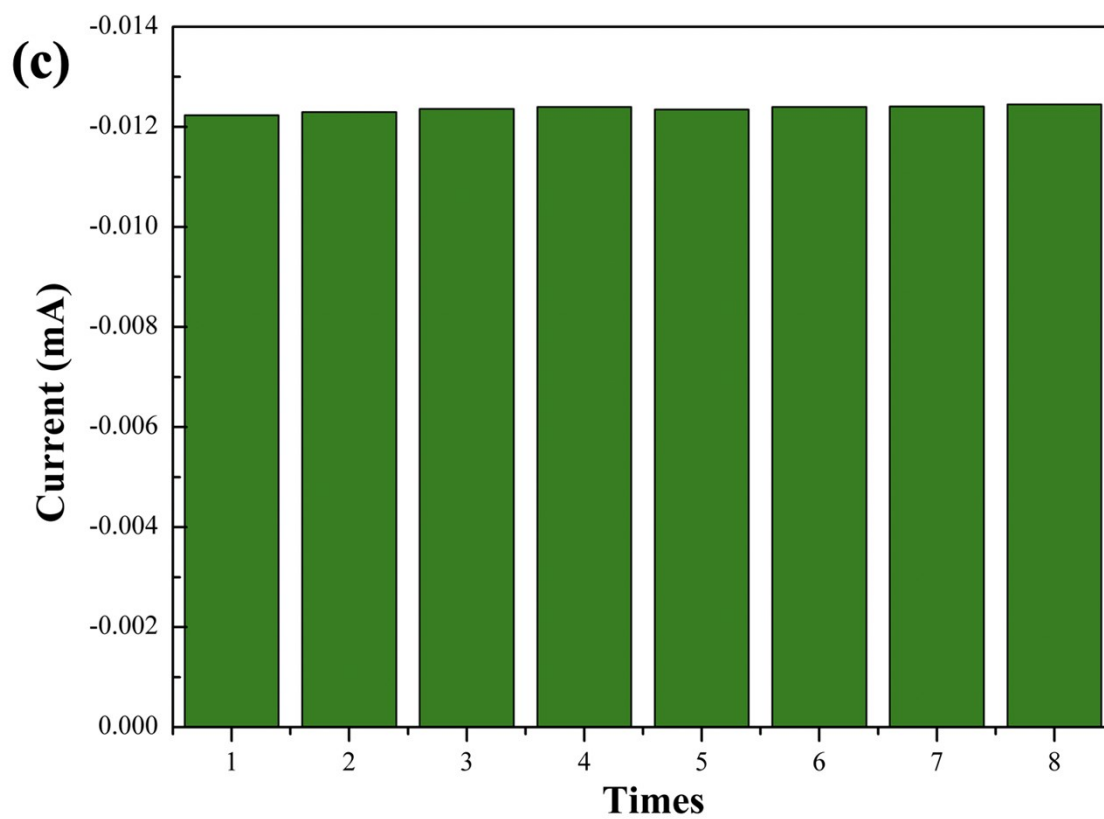

Figure S4. The evaluation of Mn-MOF modified electrode for (a) selectivity in presence of common interferences and the concentration of each interferences is 5mM, (b) the reproducibility and (c) the repeatability of 0.5 mM NFZ in PB solution (pH 5).

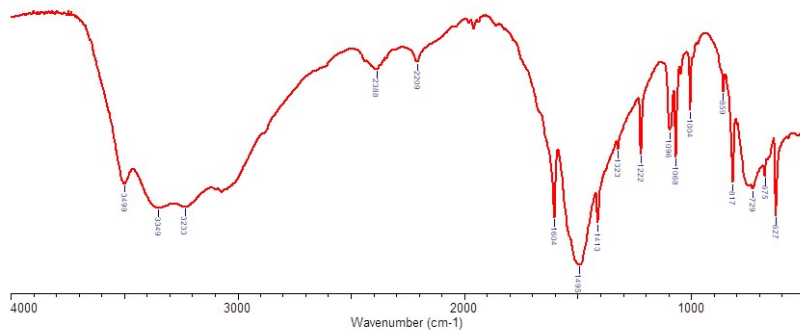

(a)

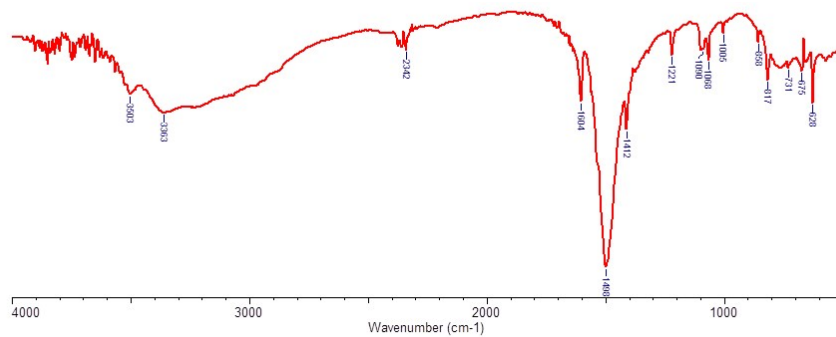

(b)

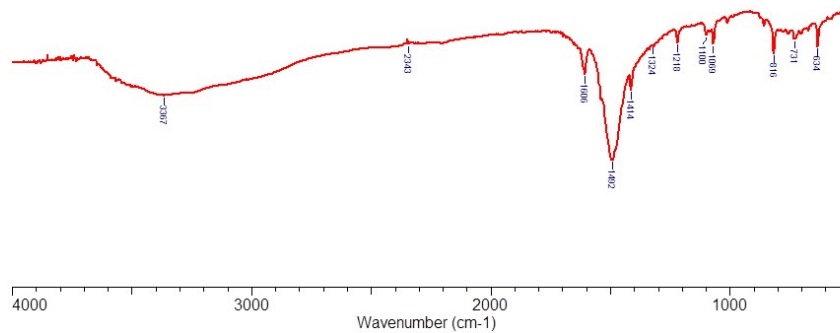

(c)

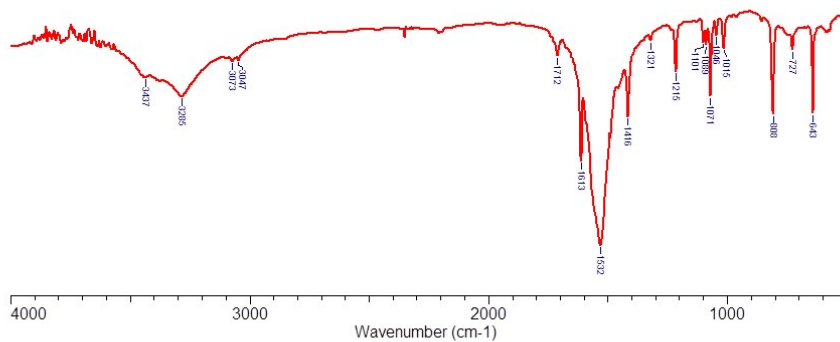

(d)

Figure S5. IR spectra of (a) Mn-MOF, (b) Fe-MOF, (c) Co-MOF, (d) Zn-MOF.

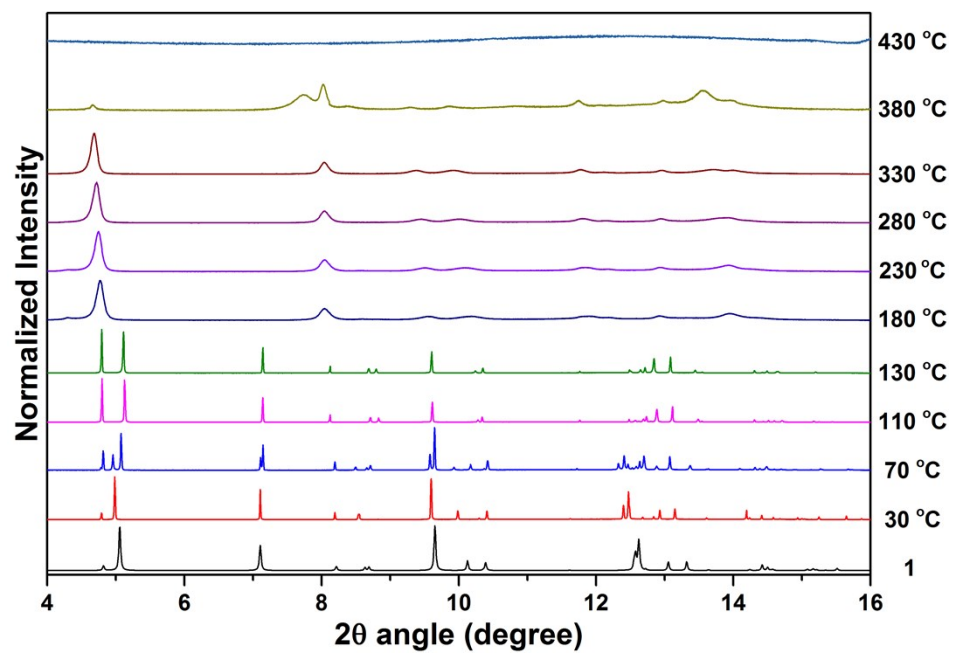

(a)

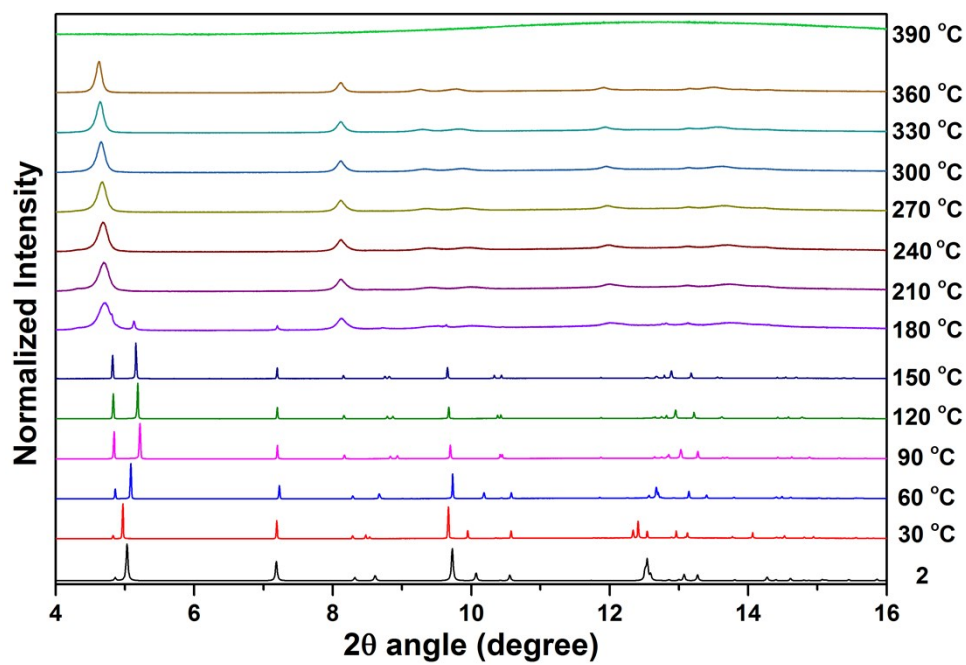

(b)

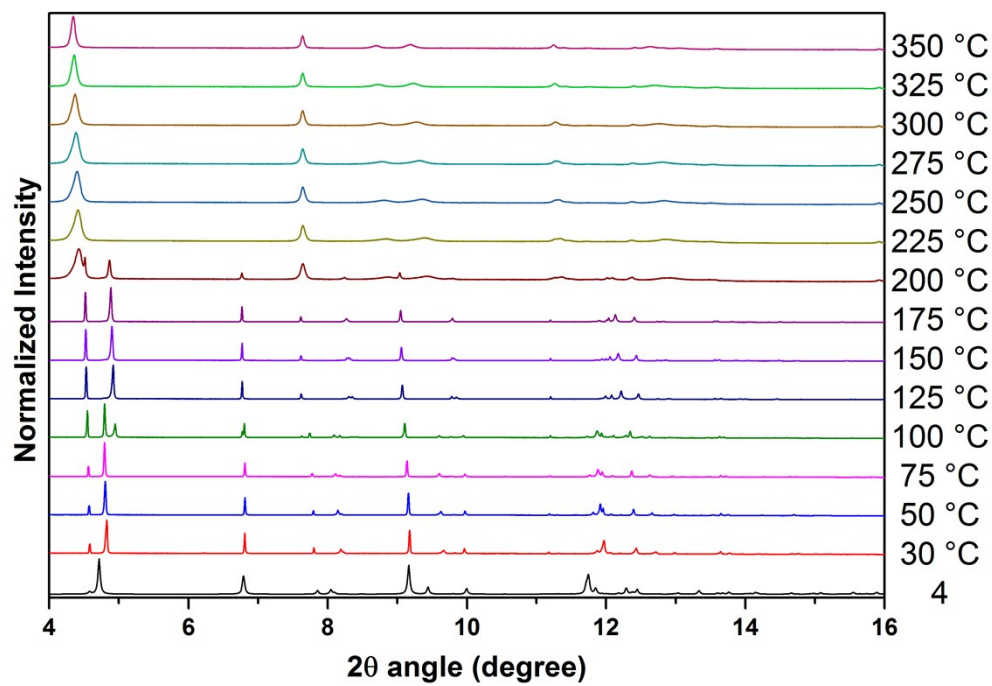

(c)

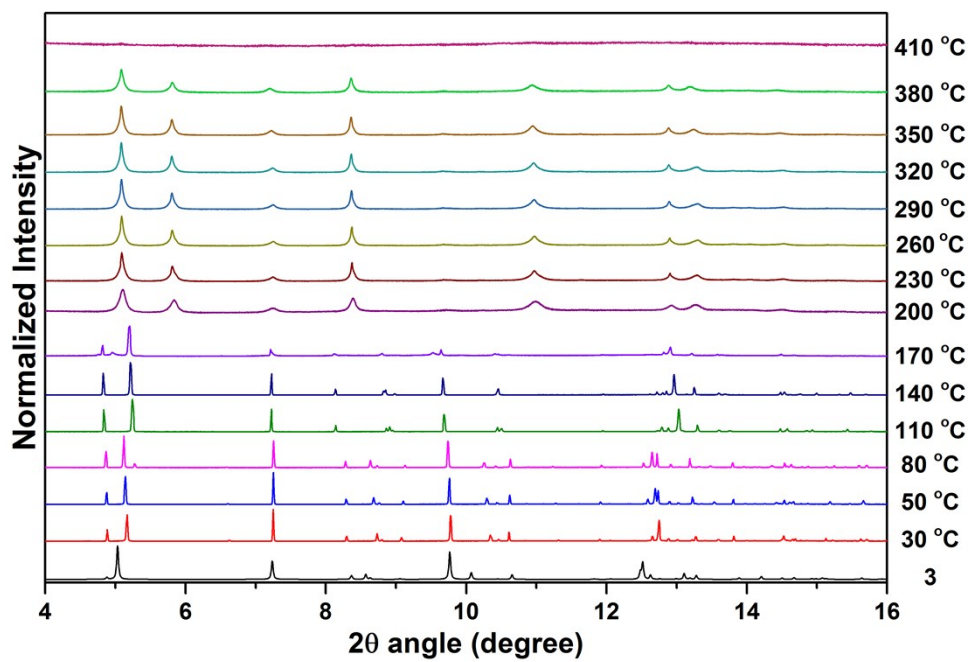

(d)

Figure S6 Temperature-dependent PXRD measurements of (a) Mn-MOF, (b) Fe-MOF, (c) Co-MOF, (d) Zn-MOF.



## References

1. A. Rahi, N. Sattarahmady, R. Dehdari Vais, H. Heli, *Sensors and Actuators B: Chemical*. 2015, **210**, 96-102.
2. B. He, G. Du, *International Journal of Electrochemical Science*. 2016, 8546-8560.
3. B. He, M. Li, *International Journal of Electrochemical Science*. 2018, 4174-4181.
4. S.-H. Chiu, Y.-L. Su, Anh V. T. Le, S.-H. Cheng, *Analytical and Bioanalytical Chemistry*. 2018, **410**, 6573-6583.
5. C. Chen, W. Chen, J. Jiang, L. Qian, F. Qiu, *International Journal of Environmental Analytical Chemistry*. 2019, 1099-1115.
6. B. He, H. Liu, *Microchemical Journal*. 2019, **150**, 104108.
7. T. Gan, J. Li, L. Xu, Y. Yao, Y. Liu, *Journal of Electroanalytical Chem.* 2019, **848**, 113287.
8. H. Wang, X. Bo, M. Zhou, L. Guo, *Analytica Chimica Acta*. 2020, **1109**, 1-8.
9. J. Cheng, Y. Li, J. Zhong, Z. Lu, G. Wang, M. Sun, Y. Jiang, P. Zou, X. Wang, Q. Zhao, Y. Wang, H. Rao, *Chemical Engineering Journal*. 2020, **398**, 125664.
